# Supplementary material for: Biochemical Responses in Populus tremula: Defending against Sucking and Leaf-Chewing Insect Herbivores
Source: MDPI journal article supplement (doi:10.3390/plants13091243), 2024-04-30
Supplement: s1 [file s1]

**Table S1** List of compounds monitoring by LC-MS-qTOF in negative ionization mode

|                  | Formula                                        | Theoretical mass | Extracted Mass | m/z      | Retention time<br>(min.) | Fragments                                                                 | Mass<br>error<br>ppm | Score |
|------------------|------------------------------------------------|------------------|----------------|----------|--------------------------|---------------------------------------------------------------------------|----------------------|-------|
| Catechin         | C <sub>15</sub> H <sub>14</sub> O <sub>6</sub> | 290.0789         | 290.0783       | 289.0718 | 2.21                     | 289.0715;<br>245.0819;<br>203.0716;<br>151.0402;<br>125.0244;<br>109.0296 | 0.44                 | 97    |
| Chlorogenic acid | C <sub>16</sub> H <sub>18</sub> O <sub>9</sub> | 354.0948         | 354.0941       | 353.0875 | 2.23                     | 353.0873;<br>191.0560; 85.0392                                            | -0.2                 | 98    |
| 4-coumaric acid  | C <sub>9</sub> H <sub>8</sub> O <sub>3</sub>   | 164.0474         | 164.0471       | 163.9491 | 2.59                     | 163.0397;<br>119.0501                                                     | 0.1                  | 99    |
| Ferulic acid     | C <sub>10</sub> H <sub>10</sub> O <sub>4</sub> | 194.0579         | 194.0586       | 193.0506 | 2.8                      | 193.0490;<br>134.0361;<br>178.0269;                                       | 0.15                 | 98    |
| Taxifolin        | C <sub>15</sub> H <sub>12</sub> O <sub>7</sub> | 304.0583         | 304.0596       |          | 2.90                     | 303.0499;<br>285.0404;<br>177.0195;<br>125.0245                           | -0.13                | 99    |

|                |                                                 |          |          |          |      |                                                                           |       |    |
|----------------|-------------------------------------------------|----------|----------|----------|------|---------------------------------------------------------------------------|-------|----|
| Rutin          | C <sub>27</sub> H <sub>30</sub> O <sub>16</sub> | 610.1529 | 610.1607 | 609.1457 | 2.93 | 609.1459;<br>300.0273                                                     | -0.01 | 99 |
| Procyanidin B1 | C <sub>30</sub> H <sub>26</sub> O <sub>12</sub> | 578.1419 | 578.1411 | 577.1347 | 3.11 | 577.1343;<br>451.1019;<br>425.0876;<br>289.0713;<br>161.0243;<br>125.0242 | -0.05 | 99 |
| Quercetin      | C <sub>15</sub> H <sub>10</sub> O <sub>7</sub>  | 302.0428 | 302.0420 | 301.0353 | 3.75 | 301.0336;<br>273.0389;<br>178.9981;<br>151.0037;<br>121.0295              | -0.98 | 99 |
| Kaempferol     | C <sub>15</sub> H <sub>10</sub> O <sub>6</sub>  | 286.0481 | 286.0476 | 286.0475 | 4.13 | 285.0404;<br>171.0451;<br>107.0138                                        | -0.94 | 99 |
